# Supplementary material
Source: PubMed Central journal article supplement (PMC4567461)
Supplement: supp_WNL.0000000000001925_Tables.pdf [file supp_WNL.0000000000001925_Tables.pdf]

**Appendix e-1**

**table e-1a: Models for Very Good Outcome and Good Outcome using full NIHSS**

| Parameter                                      | Model for Functionally Normal/Near-Normal Outcome ( $\leq 1$ ) |                |         | Model for Functionally Independent Outcome ( $\leq 2$ ) |                |          |
|------------------------------------------------|----------------------------------------------------------------|----------------|---------|---------------------------------------------------------|----------------|----------|
|                                                | Estimate                                                       | Standard Error | P-value | Estimate                                                | Standard Error | P-value  |
| Intercept                                      | 1.2714                                                         | 0.9442         | 0.1782  | 3.6197                                                  | 0.9845         | 0.0002   |
| Thrombolytic therapy (y/n)                     | 3.1286                                                         | 0.8567         | 0.0003  | 1.4934                                                  | 0.843          | 0.0765   |
| Age (years)                                    | 0.0173                                                         | 0.0113         | 0.1254  | -0.00797                                                | 0.012          | 0.5062   |
| Systolic Blood Pressure (mm/Hg)                | -0.00522                                                       | 0.00377        | 0.1661  | -0.00543                                                | 0.00367        | 0.1392   |
| History of Diabetes (y/n)                      | -0.7244                                                        | 0.1348         | <.0001  | -0.8301                                                 | 0.1282         | <.0001   |
| NIHSS                                          | -0.00355                                                       | 0.0573         | 0.9506  | -0.0749                                                 | 0.0561         | 0.1821   |
| Time to Treatment (minutes)                    | 0.000716                                                       | 0.000928       | 0.4408  | 0.000447                                                | 0.000898       | 0.6188   |
| Thrombolytic therapy * Systolic Blood Pressure | -0.0117                                                        | 0.0052         | 0.0242  | -0.00364                                                | 0.00513        | 0.4782   |
| Thrombolytic therapy * Time to Treatment       | -0.00428                                                       | 0.0013         | 0.001   | -0.00266                                                | 0.00127        | 0.0363   |
| Age*NIHSS                                      | -0.00287                                                       | 0.000882       | 0.0011  | -0.00168                                                | 0.00085        | 0.0475   |
| ROC Area                                       | c                                                              | 0.784          | 2155.5  | c                                                       | 0.792          | 2219.337 |

**table e-1b: Model for Severe Disability/Death Outcome using full NIHSS ( $\geq 5$ )**

| Parameter                           | Estimate | Standard Error | P-value |
|-------------------------------------|----------|----------------|---------|
| Intercept                           | -7.4127  | 0.5276         | <.0001  |
| Age (years)                         | 0.0476   | 0.00662        | <.0001  |
| NIHSS                               | 0.1409   | 0.0101         | <.0001  |
| Serum glucose <sup>a</sup> (mmol/L) | 0.076    | 0.0161         | <.0001  |
| ROC Area                            | c        | 0.770          |         |

<sup>a</sup>truncated at 25 mmol/L

**table e-2a: Models for Very Good Outcome and Good Outcome using 8-item Stroke Severity Score<sup>a</sup>**

| Parameter                                      | Model for Functionally Normal/Near-Normal Outcome ( $\leq 1$ ) |                |         | Model for Functionally Independent Outcome ( $\leq 2$ ) |                |         |
|------------------------------------------------|----------------------------------------------------------------|----------------|---------|---------------------------------------------------------|----------------|---------|
|                                                | Estimate                                                       | Standard Error | p-value | Estimate                                                | Standard Error | p-value |
| Intercept                                      | 0.679044                                                       | 0.87329        | 0.4369  | 2.811222                                                | 0.919365       | 0.0022  |
| Thrombolytic therapy (y/n)                     | 2.776024                                                       | 0.843992       | 0.001   | 1.221631                                                | 0.833195       | 0.1426  |
| Age (years)                                    | 0.003668                                                       | 0.010182       | 0.7187  | -0.01675                                                | 0.010799       | 0.1209  |
| Systolic Blood Pressure (mm/Hg)                | -0.00417                                                       | 0.003713       | 0.2616  | -0.00478                                                | 0.003625       | 0.1877  |
| History of Diabetes (y/n)                      | -0.68761                                                       | 0.132608       | <.0001  | -0.78552                                                | 0.126611       | <.0001  |
| Stroke Severity Score                          | -0.06103                                                       | 0.10586        | 0.5643  | -0.17016                                                | 0.105627       | 0.1072  |
| Time to Treatment (minutes) <sup>b</sup>       | 0.003991                                                       | 0.001166       | 0.0012  | 0.00388                                                 | 0.00119        | 0.0022  |
| Thrombolytic therapy * Systolic Blood Pressure | -0.01046                                                       | 0.005116       | 0.0409  | -0.00256                                                | 0.005061       | 0.6124  |
| Thrombolytic therapy * Time to Treatment       | -0.0037                                                        | 0.001267       | 0.0035  | -0.00228                                                | 0.001252       | 0.0686  |
| Age* Stroke Severity Score                     | -0.00365                                                       | 0.00163        | 0.0253  | -0.00208                                                | 0.001599       | 0.194   |
| ROC Area                                       | c                                                              | 0.756          |         | c                                                       | 0.771          |         |

<sup>a</sup>8 variable Stroke Severity Score is used, <sup>b</sup>Time to Treatment is truncated at 400 minutes

**table e-2b: Model for Severe Disability/Death Outcome ( $\geq 5$ ) using 8-item Stroke Severity Score<sup>a</sup>**

| Parameter              | Estimate  | Standard Error | P-value |
|------------------------|-----------|----------------|---------|
| Intercept              | -6.919617 | 0.530856       | <.0001  |
| Age (years)            | 0.048755  | 0.006643       | <.0001  |
| Stroke Severity Score  | 0.220714  | 0.024346       | <.0001  |
| Serum glucose (mmol/L) | 0.074513  | 0.015837       | <.0001  |
| ROC Area               | c         | 0.754          |         |

<sup>a</sup>8 variable Stroke Severity Score is used; <sup>b</sup>truncated at 25 mmol/L

**table e-3: Model Performance in ECASS3 (Validation) Dataset**

| <b>Outcome</b>                | <b>Items in Stroke Severity Scale</b> | <b>Observed in validation data</b> | <b>Predicted</b> | <b>Total # with YES outcome</b> | <b>Bias (O-P)</b> | <b>ROC area for model in Validation Data</b> | <b>p-value from goodness-of-fit test (4 df)</b> | <b>TUFTS (PACE) ROC (Derivation Data)</b> |
|-------------------------------|---------------------------------------|------------------------------------|------------------|---------------------------------|-------------------|----------------------------------------------|-------------------------------------------------|-------------------------------------------|
| <b>Very good (mRS 0-1)</b>    | 3-item                                | 0.49554                            | 0.46732          | 389                             | 0.02822           | 0.749                                        | 0.4550                                          | 0.764                                     |
| <b>Good outcome (mRS 0-2)</b> | 3-item                                | 0.65223                            | 0.59383          | 512                             | 0.0584            | 0.790                                        | 0.1442                                          | 0.781                                     |
| <b>Very good (mRS 0-1)</b>    | 8-item                                | 0.49554                            | 0.4163           | 389                             | 0.07924           | 0.752                                        | 0.0082                                          | 0.756                                     |
| <b>Good outcome (mRS 0-2)</b> | 8-item                                | 0.65223                            | 0.54177          | 512                             | 0.11046           | 0.794                                        | 0.0002                                          | 0.771                                     |
| <b>Very good (mRS 0-1)</b>    | 15-item                               | 0.49554                            | 0.48759          | 389                             | 0.00795           | 0.760                                        | 0.6610                                          | 0.784                                     |
| <b>Good outcome (mRS 0-2)</b> | 15-item                               | 0.65223                            | 0.61238          | 512                             | 0.03985           | 0.802                                        | 0.9813                                          | 0.792                                     |
